# Supplementary material
Source: ML conference proceedings conference paper supplement (https://aclanthology.org/P15-2001)
Supplement: Datasets [file P15-2001.Datasets.zip]

## Similitud entre palabras - Word similarity

En el fichero siguiente tendréis una lista de pares de sustantivos. Vuestra tarea consiste en medir la similitud entre los dos sustantivos. Por favor leed las siguientes indicaciones y pensad bien las ideas y conceptos derivados de cada palabra para evaluar su similitud.

Para evaluar la similitud de las palabras, tendréis que usar una escala de 0 a 4, pudiendo usar los valores enteros y medios de la escala {0, 0.5, 1, 1.5, 2, 2.5, 3, 3.5, 4}. Debajo están las explicaciones de los diferentes niveles enteros de similitud. Podéis cambiar los valores tantas veces como veáis hasta encontrar el valor que mejor se ajusta a la escala. Por favor sed consistentes en vuestro criterio y en las puntuaciones que asignéis.

### Escala de puntuación:

|          |                                            |                                                                                                                                 |
|----------|--------------------------------------------|---------------------------------------------------------------------------------------------------------------------------------|
| <b>4</b> | <b>Muy similares</b>                       | Los detalles más importantes de ambas palabras se mantienen.                                                                    |
| <b>3</b> | <b>Algo similares</b>                      | Detalles de relativa importancia no se conservan en ambas palabras.                                                             |
| <b>2</b> | <b>Algo relacionadas pero no similares</b> | No son similares en sí pero están directamente relacionadas. Pueden aparecer en las mismas frases o en contextos muy parecidos. |
| <b>1</b> | <b>Poco relacionadas</b>                   | Tienen muy poco en común, sólo comparten el mismo dominio.                                                                      |
| <b>0</b> | <b>Ni relacionadas ni similares</b>        | No tienen nada en común.                                                                                                        |

#### (4: Muy similares)

Las dos palabras tienen significados muy similares y comparten sus ideas y conceptos más importantes.

#### Ejemplos de pares de palabras con un "4" como puntuación.

|          |          |
|----------|----------|
| edificio | inmueble |
| burro    | asno     |
| rana     | sapo     |

### (3: Algo similares)

Las dos palabras comparten la mayoría de conceptos e ideas, pero con algunos detalles diferentes. Una palabra puede ser más específica que la otra.

#### Ejemplos de pares de palabras con un "3" como puntuación.

|       |        |
|-------|--------|
| tigre | león   |
| ópera | teatro |

### (2: Algo relacionadas pero no similares)

Las dos palabras tienen un significado diferente, pero comparten conceptos e ideas relacionadas. Están relacionadas de algún modo y podrían aparecer en frases o contextos muy parecidos.

#### Ejemplos de pares de palabras con un "2" como puntuación.

|           |        |
|-----------|--------|
| conductor | coche  |
| lápiz     | dibujo |

### (1: Poco relacionadas)

Las dos palabras se refieren a conceptos e ideas diferentes pero comparten el mismo dominio. Podrían ser encontradas juntas en documentos sobre el mismo tema o dominio.

#### Ejemplos de pares de palabras con un "1" como puntuación.

|          |           |
|----------|-----------|
| cine     | palomitas |
| software | teclado   |
| estadio  | árbitro   |

(0: Ni relacionadas ni similares) Las dos palabras no tienen significados parecidos ni pertenecen al mismo tema o dominio.

#### Ejemplos de pares de palabras con un "0" como puntuación.

|       |       |
|-------|-------|
| lápiz | rana  |
| caja  | esquí |
