# Supplementary material
Source: ML conference proceedings conference paper supplement (https://aclanthology.org/P15-2001)
Supplement: Datasets [file P15-2001.Datasets.zip]

## شباهت معنایی کلمات فارسی

با تشکر فراوان از قبول زحمت جنابعالی، لطفاً با توجه به میزان شباهت معنایی کلمات، یکی از گزینه های صفر تا چهار (۰-۴) را انتخاب نموده و چنانچه لازم میدانید به صورت اعشاری نیم نمره ای (به عنوان مثال 2.5) نیز میتوانید امتیازدهی نمایید.

۴- **خیلی شبیه:** معنای دو کلمه یکسان یا به یکدیگر خیلی نزدیک میباشد. مثال:

|         |         |
|---------|---------|
| تندرستی | سلامتی  |
| مغازه   | فروشگاه |
| اتوبان  | بزرگراه |

۳- **نسبتاً شبیه:** معنای دو کلمه به یکدیگر شبیه بوده ولی دارای تفاوت هایی میباشد. مثال:

|        |         |
|--------|---------|
| ببر    | پلنگ    |
| لیوان  | استکان  |
| خیابان | بزرگراه |

۲- **ارتباط مستقیم:** دو کلمه با یکدیگر ارتباط معنایی مستقیم دارند ولی مشابه نیستند. مثال:

|        |         |
|--------|---------|
| ماشین  | تایر    |
| مغازه  | فروشنده |
| بیماری | پزشک    |

۱- **ارتباط غیرمستقیم:** دو کلمه ارتباط مختصر و دوری با یکدیگر دارند. مثال:

|       |            |
|-------|------------|
| ماشین | آلودگی هوا |
| مغازه | مالیات     |
| پزشک  | قرص        |

۰ (صفر) - **نامرتب:** دو کلمه به یکدیگر هیچ شباهتی نداشته و ارتباط معنایی نیز ندارند.

|         |       |
|---------|-------|
| خرگوش   | مداد  |
| اسکی    | جعبه  |
| ساختمان | گلابی |
